# Supplementary material
Source: Springer Nature journal article supplement (https://www.springermedizin.de/resource/supplementary/13002_2007_104_MOESM2_ESM.pdf/9627166)
Supplement: MOESM2 [file 9627166]

# Bishinga (sorghum)

## Edible Bishinga

## Non-edible bishinga

### Afukanni

Seed color: White

Stalk sweetness: Sweet

Panicle type: semicompact erect

### Fendisha

Seed color: Red, Light Red, White

Panicle type: Semicompact, lax, very lax

Stalk sweetness: Sweet, Insipid

### Muyra

Seed color: Red, White, Yellow

Panicle type: Goose compact  
(flat, pointed, pig-mouth tip)

Stalk sweetness: Sweet, Insipid

### Worabe

Seed color: Red, White

Panicle type: Goose

Stalk sweetness: Sweet, Insipid

### Ammajjeta

Seed color: White, Red

Stalk Sweetness: Sweet

Panicle type:Goose

### Jeldi

Seed color:Dark Red, Red, Light red, White

Panicle type:Goose

Stalk sweetness: Insipid, Sweet

### Mesengo

Seed color: White, Red

Panicle type: Goose necked

Stalk sweetness: Goose necked

### Alisho

Seed color: white

Stalk sweetness: sweet

Panicle type: Goose

### Kirmi

Seed color: White, Light Red

Panicle type: Goose

Stalk sweetness: Sweet

### Wahelo

Seed color: Light red

Panicle type: goose

Stalk sweetness: Sweet

### Dinni

Seed color: White

Stalk sweetness: Sweet

Panicle type: Compact, semicompact

### Matsuggi

Seed color: Red, White

Panicle: Goose necked

Stalk sweetness: Sweet, Insipid

### Wegere

Seed color: white, Red, Yellow

Panicle type: Goose  
(pointed, flat end)

Stalk sweetness: Sweet, Insipid
